# Supplementary material for: Prey exploitation and dispersal strategies vary among natural populations of a predatory mite
Source: PubMed Central journal article supplement (PMC6238141; doi:10.1002/ece3.4446), 2018-10-13

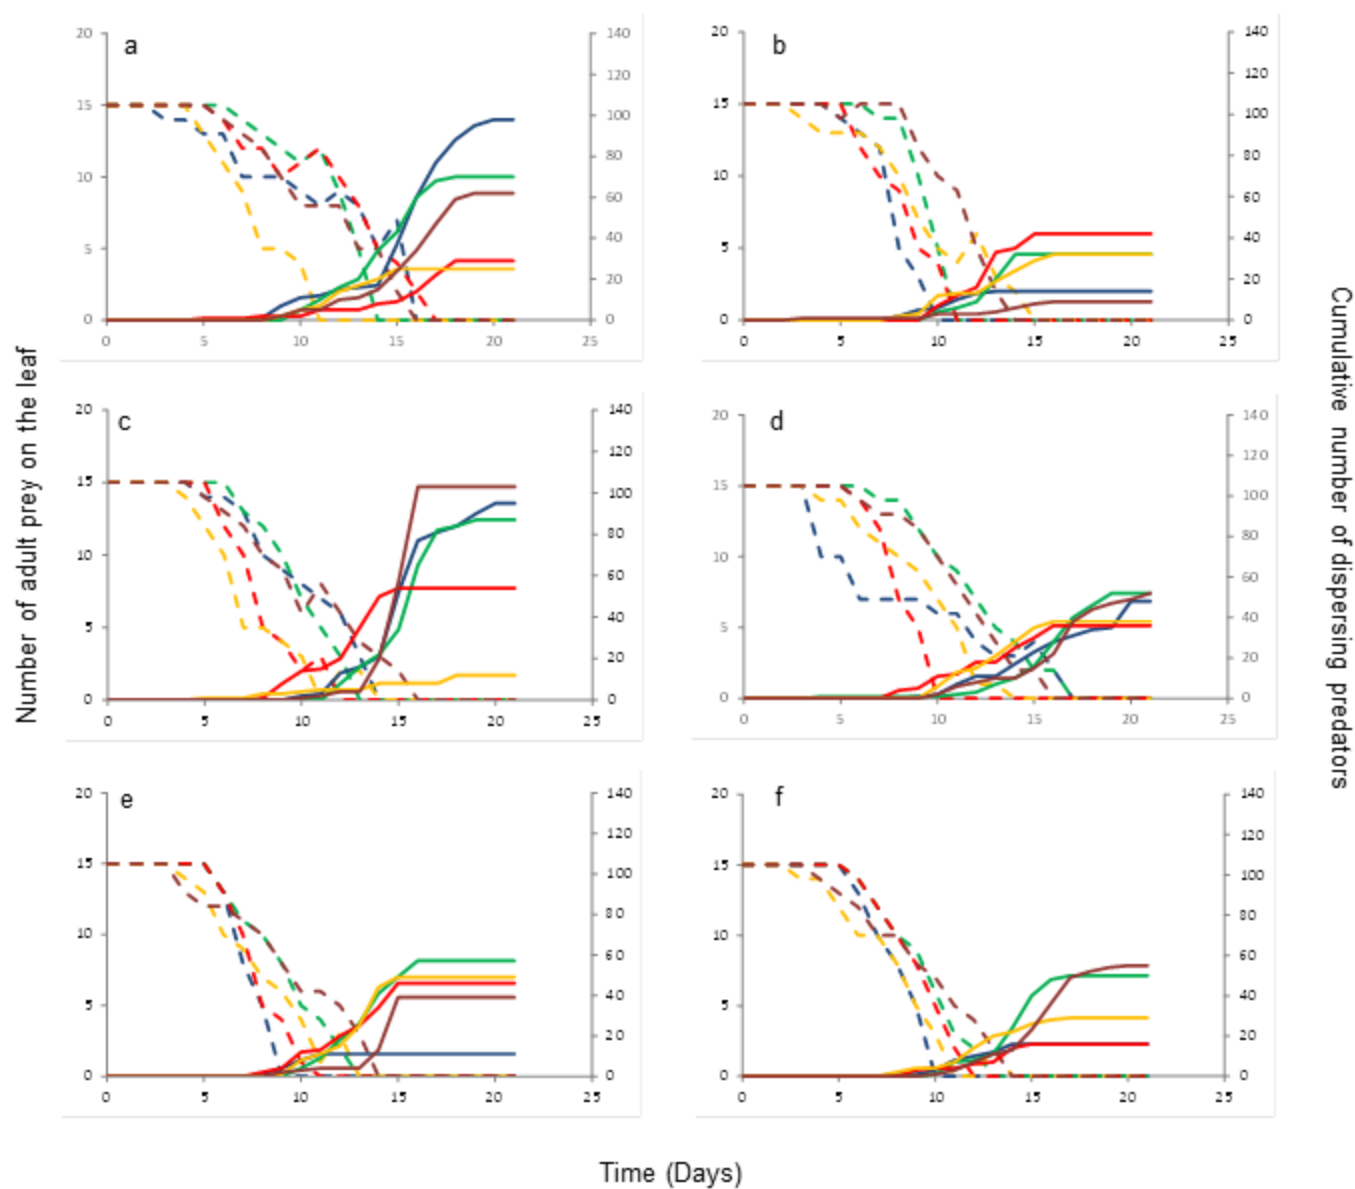

Supplement: ECE3-8-10384-s002.pdf [file ECE3-8-10384-s002.pdf]
